# Supplementary material for: Safety and efficacy of the JAK inhibitor tofacitinib citrate in patients with alopecia areata
Source: JCI journal article supplement (doi:10.1172/jci.insight.89776), 2016-09-21

## **Supplemental Appendix**

1. Supplemental Table 1 (2-3)
2. Supplemental Figures 1-4 (4-9)

Milène Crispin<sup>1,8</sup>, Justin M. Ko<sup>1,8</sup>, Brittany G. Craiglow<sup>2,3</sup>,

Shufeng Li<sup>1</sup>, Gautam Shankar<sup>1</sup>

Jennifer R. Urban<sup>4</sup>, James C. Chen<sup>5,6</sup>, Jane E. Cerise<sup>5</sup>, Ali Jabbari<sup>5</sup>

Mårten CG Winge<sup>1</sup>, M. Peter Marinkovich<sup>1</sup>

Angela M. Christiano<sup>5,7</sup>

Anthony E. Oro<sup>1,9</sup>, Brett A. King<sup>2,9</sup>

<sup>1</sup>Program in Epithelial Biology and Department of Dermatology, Stanford University School of Medicine, Stanford, CA 94305; <sup>2</sup>Departments of Dermatology, <sup>3</sup>Pediatrics, and <sup>4</sup>Internal Medicine, Yale University School of Medicine, New Haven, CT 06520; <sup>5</sup>Department of Dermatology and <sup>6</sup>Department of Systems Biology, <sup>7</sup>Department of Genetics & Development, Columbia University, New York, New York 10032

<sup>8</sup>These authors contributed equally

<sup>9</sup>co-senior authors

**Supplemental Table 1.** This gene list represents the top 50 statistically significant genes that are most differentially expressed between slow (SR) and likely non-responders (NR).

| Gene      | ttest(s.n)  | log(fc)     |
|-----------|-------------|-------------|
| SLC7A14   | 0.002767832 | 3.523309021 |
| MIOX      | 0.015596102 | 3.191259203 |
| DIRC1     | 0.004402072 | 3.058898071 |
| SLCO1A2   | 0.01963604  | 2.94139846  |
| ANKRD20A4 | 0.039423338 | 2.88185743  |
| PDC       | 0.011076336 | 2.753828344 |
| OTC       | 0.038039608 | 2.680887437 |
| ZNF280A   | 0.02930004  | 2.632885846 |
| BCYRN1    | 0.037133214 | 2.614524478 |
| GDPD4     | 0.004362721 | 2.578516756 |
| FMR1-AS1  | 0.032126901 | 2.542406675 |
| MIR4326   | 0.037907732 | 2.537403617 |
| FAM55B    | 0.034753999 | 2.428320795 |
| HIST1H3J  | 0.02383998  | 2.221549811 |
| HCRTR1    | 0.007586759 | 2.168706377 |
| CFHR3     | 0.033157002 | 2.120530826 |
| MIR590    | 0.00191407  | 2.043752204 |
| PSORS1C3  | 0.010229834 | 2.029357634 |
| FABP5P3   | 0.030070292 | 1.96029711  |
| XIRP1     | 0.005415287 | 1.886416152 |
| GPR31     | 0.041739374 | 1.863002684 |
| ASB5      | 0.00353221  | 1.858190055 |
| RAET1K    | 0.024034222 | 1.840665554 |
| SNORD9    | 0.03600298  | 1.807327907 |
| POTEKP    | 0.043495986 | 1.800695457 |

|            |             |              |
|------------|-------------|--------------|
| HOXA11-AS1 | 0.005042483 | 1.78186747   |
| HLA2       | 0.014048475 | 1.760739028  |
| LINC00402  | 0.048743482 | 1.754801301  |
| ARMCX3-AS1 | 0.043888376 | 1.737035566  |
| SFTPA2     | 0.046059014 | 1.719020263  |
| FLJ45139   | 0.037083091 | 1.715862546  |
| FLJ38723   | 0.016558928 | 1.702035568  |
| MIR1302-3  | 0.039082597 | 1.67754393   |
| ABCG8      | 0.031811604 | 1.582217348  |
| GAL3ST3    | 0.027780041 | 1.468000011  |
| OR10AD1    | 0.041227113 | 1.424409801  |
| PCDHA1     | 0.022831717 | 1.422256826  |
| OR4D11     | 0.040630715 | -1.56992102  |
| PCDHA13    | 0.046153857 | -1.672451755 |
| HIST1H1B   | 0.048226688 | -1.680579141 |
| HIST2H2AB  | 0.025019708 | -1.686828477 |
| SYT14L     | 0.011682506 | -1.714422245 |
| FLJ45832   | 0.036863506 | -1.731170151 |
| FAM58BP    | 0.004432895 | -2.252232834 |
| RSPH10B2   | 0.049633961 | -2.324666211 |
| IGLL1      | 0.048819027 | -2.429162596 |
| SEMG2      | 0.006326554 | -3.147040553 |
| IZUMO2     | 0.032228509 | -3.221385982 |
| H2BFM      | 0.028766749 | -3.34025549  |
| NMUR2      | 0.044236358 | -3.656580098 |

**Supplemental Figure 1:** We collected scalp biopsies from 28 patients and performed transcriptomal analysis using RNA sequencing. (a) A 3D plot of ALADIN CTL, IFN and KRT scores shows that groups 1 and 3 cluster at baseline and cluster at week 8 (red = group 3 at baseline, orange = group 1 at baseline, purple = group 3 at week 8, blue = group 1 at week 8) (b) A plot of CTL score at baseline and week 8 for group 1 and group 3 (red=AU/AT, green=Ophiasis, blue=AA) and (c) plot of IFN score at baseline and week 8 for group 1 and group 3 (red = AU/AT, green = Ophiasis, blue = AA) changes in CTL scores and in IFN scores between baseline and week 8 were not significantly different in group 1 compared with group 3.

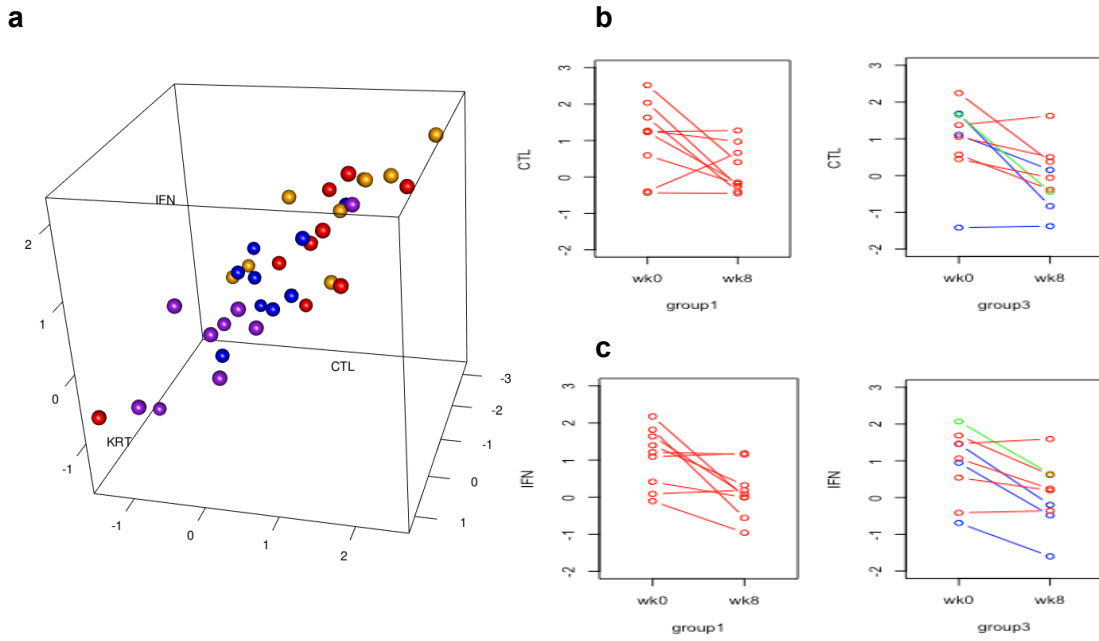

**Supplemental Figure 2:** Unsupervised hierarchical clustering of all biosamples taken at week 8, naïve to response success, was performed using previously published AA gene expression signatures. The clustering shows statistically significant separation of response correlated with SALT>50 scores ( $p<0.05$ ). Secondary clustering was observed particularly in the non-responder group, suggesting the possibility of distinct “subtypes” of non-responder patients.

## Supplemental Figure 2

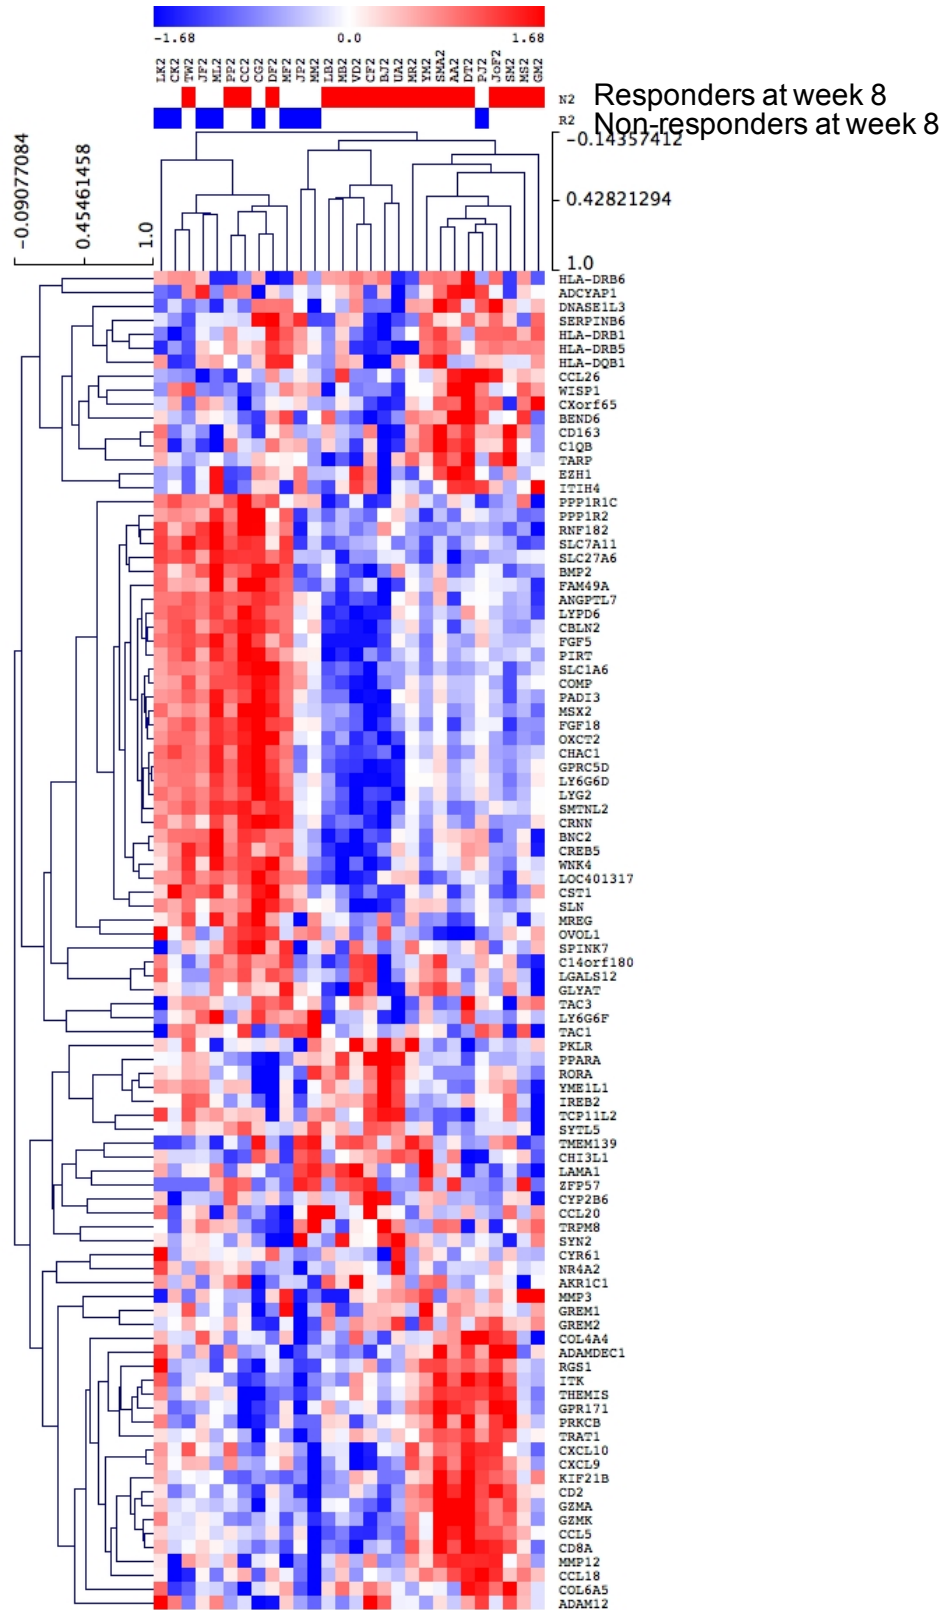

**Supplemental Figure 3:** (a) A repeat of the unsupervised hierarchical clustering on published AA gene signatures including biosamples across both timepoints reveals a time-dependent co-clustering of patients. Specifically, patients designated as true responders in group 3 showed the most significant molecular divergence between initial (teal) and week 8 (blue) time points, represented as samples falling in disparate clusters based. The patients designated as nonresponders again displayed two distinct molecular subpopulations. (b) A principal component (PC) analysis of this data reveals that the non-responder molecular subtypes can be represented as patients whose change in molecular signature over time are not concordant with those observed in the responders (true non-responders), and those that are concordant, but seemingly delayed (slow responders). These molecular subtypes were subsequently defined and used for naïve biomarker development for predicting drug response.

Supplemental Figure 3

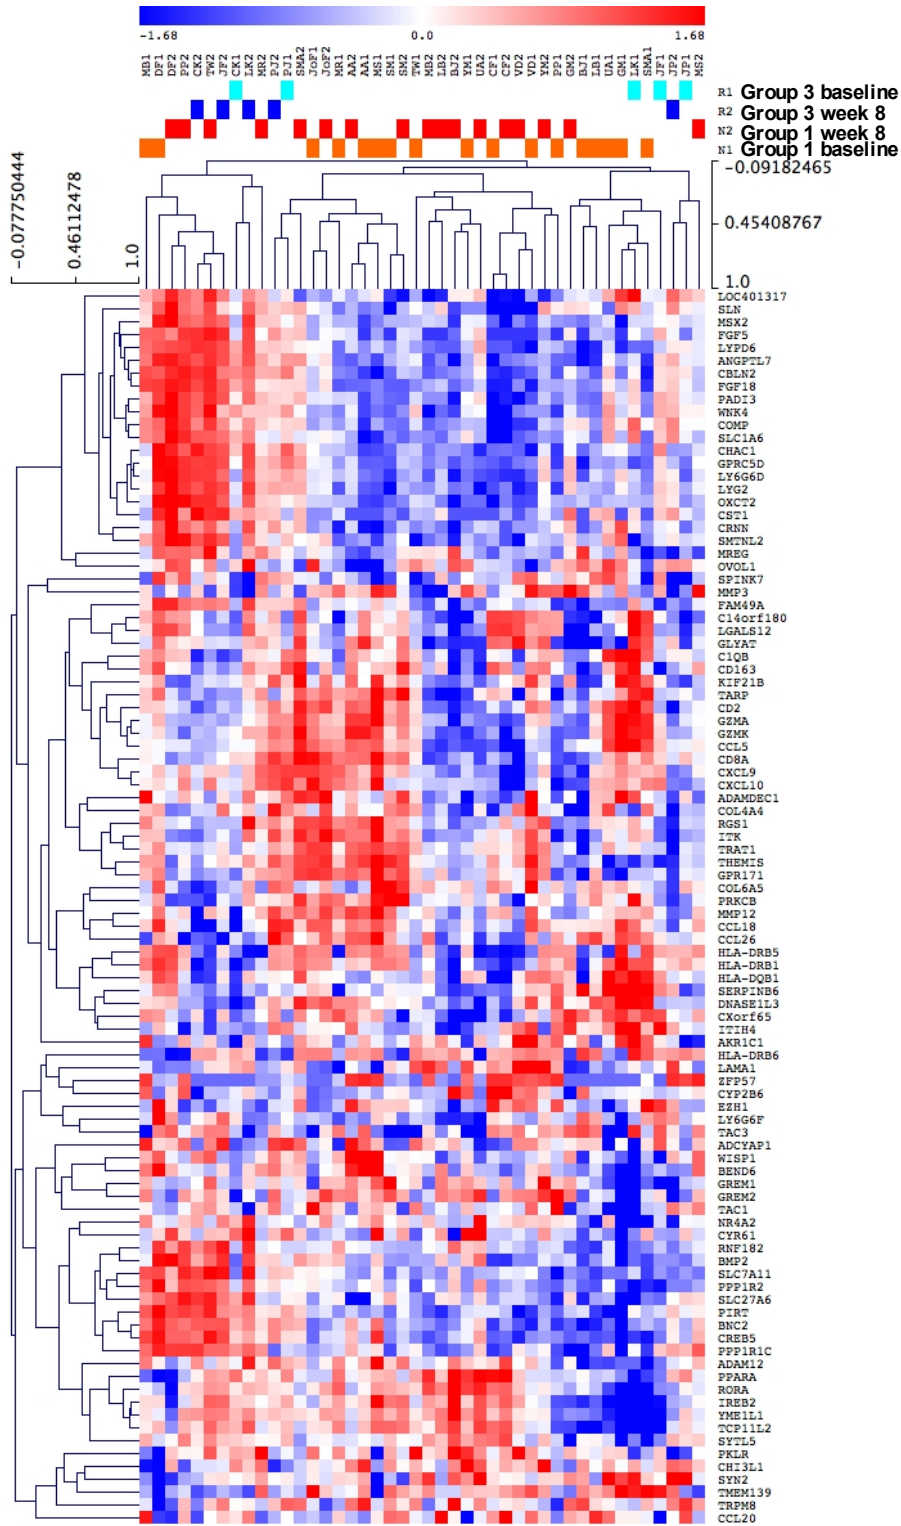



**Supplemental Figure 4:** The mean time until the start of scalp hair shedding during the follow up period was 10.8 weeks, with the median 8.5 weeks

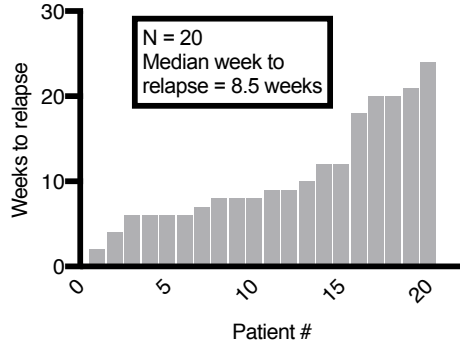

Supplement: sd1 [file 1]
